# Supplementary material for: Comparative transcriptomic and proteomic signature of lung alveolar macrophages reveals the integrin CD11b as a regulatory hub during pneumococcal pneumonia infection
Source: Front Immunol. 2023 Sep 18;14:1227191. doi: 10.3389/fimmu.2023.1227191 (PMC10544576; doi:10.3389/fimmu.2023.1227191)
Supplement: Supplementary Table 4 — Overrepresented diseases analyzed by DOSE. Related to Figure 1G . [file Table_4.xlsx]

## Sheet: oraDOresults
ID	Description	GeneRatio	pvalue	p.adjust	qvalue	geneID	Count
DOID:1927	sphingolipidosis	6/34	0.00000608	0.003420882	0.002449655	ICAM1/NPC2/SLC6A4/GLA/GLB1/NAGA	6
DOID:850	lung disease	20/499	0.000014	0.003931283	0.002815147	ITGAM/ILBP/HMOX1/EIF2AK2/RF5/IRAK3/CTSK/MSR1/ELANE/SOD2/CAMP/PCNA/TLR2/ICAM1/ITGB2/SLC6A4/CTSS/CASP6/IKBKB/CTSH	20
DOID:37	skin disease	16/350	0.0000231	0.004343035	0.003109998	LCN2/HMOX1/ANPEP/SQSTM1/DST/IRAK3/DNMT1/LTF/C3/SOD2/CAMP/PCNA/TLR2/ICAM1/SLC6A4/LPIN1	16
DOID:13141	uveitis	5/28	0.0000356	0.005017021	0.003592632	LCN2/ESD/SOD2/TLR2/ICAM1	5
DOID:399	tuberculosis	10/156	0.0000563	0.006340888	0.004540637	HP/ITGA5/LCN2/C3/ESD/CAMP/TLR2/ICAM1/MRC1/LTA4H	10
DOID:74	hematopoietic system disease	18/474	0.0000807	0.006972878	0.004993198	MPO/LCN2/HMOX1/EIF2AK2/CFB/ITGAM/LTF/C3/CD177/ELANE/CAMP/TLR2/ICAM1/ITGB2/SLC2A1/IDH1/CAPN1/FCGRT	18
DOID:16	integumentary system disease	16/394	0.0000964	0.006972878	0.004993198	LCN2/HMOX1/ANPEP/SQSTM1/DST/IRAK3/DNMT1/LTF/C3/SOD2/CAMP/PCNA/TLR2/ICAM1/SLC6A4/LPIN1	16
DOID:10534	stomach cancer	13/274	0.0000991	0.006972878	0.004993198	MPO/HK2/HMOX1/TOP2A/PLXNA1/LGALS3BP/BAK1/SOD2/MAD2L1/PCNA/ICAM1/SLC2A1/CASP6	13
DOID:640	encephalomyelitis	4/22	0.000211065	0.011383715	0.008151748	C3/TLR2/ICAM1/IKBKB	4
DOID:3211	lysosomal storage disease	9/150	0.000222199	0.011383715	0.008151748	HMOX1/SOD2/ICAM1/NPC2/OPLAH/SLC6A4/GLA/GLB1/NAGA	9
DOID:3083	chronic obstructive pulmonary disease	11/220	0.000222417	0.011383715	0.008151748	ITGAM/HMOX1/MSR1/SOD2/CAMP/PCNA/TLR2/ICAM1/ITGB2/SLC6A4/CTSS	11
DOID:10652	Alzheimer's disease	16/430	0.000264539	0.012069067	0.008642521	MPO/HP/HMOX1/EIF2AK2/ITGAM/SQSTM1/LTF/C3/SOD2/ICAM1/CYBB/CAPN1/COMT/CTSD/SLC6A4/CASP6	16
DOID:680	tauopathy	16/434	0.000293694	0.012069067	0.008642521	MPO/HP/HMOX1/EIF2AK2/ITGAM/SQSTM1/LTF/C3/SOD2/ICAM1/CYBB/CAPN1/COMT/CTSD/SLC6A4/CASP6	16
DOID:2452	thrombophilia	4/24	0.000300119	0.012069067	0.008642521	ITGAM/ELANE/TLR2/ITGB2	4
DOID:104	bacterial infectious disease	12/271	0.00035248	0.012983605	0.009297412	ITGAM/HP/ITGA5/LCN2/C3/ESD/CAMP/TLR2/ICAM1/ITGB2/MRC1/LTA4H	12
DOID:9970	obesity	13/313	0.000368983	0.012983605	0.009297412	LBP/HP/LCN2/CTSK/C3/SOD2/TLR2/ICAM1/ITGB2/SLC2A1/COMT/SLC6A4/CTSS	13
DOID:3480	uveal disease	5/46	0.000407698	0.013240255	0.009481196	LCN2/ESD/SOD2/TLR2/ICAM1	5
DOID:9455	lipid storage disease	8/130	0.000423312	0.013240255	0.009481196	HMOX1/SOD2/ICAM1/NPC2/SLC6A4/GLA/GLB1/NAGA	8
DOID:654	overnutrition	13/322	0.000484033	0.013327255	0.009543496	LBP/HP/LCN2/CTSK/C3/SOD2/TLR2/ICAM1/ITGB2/SLC2A1/COMT/SLC6A4/CTSS	13
DOID:12337	varicocele	3/112	0.000520781	0.013327255	0.009543496	HMOX1/BAK1/NT5E	3
DOID:14499	Fabry disease	3/112	0.000520781	0.013327255	0.009543496	ICAM1/GLA/NAGA	3
DOID:9742	pelvic varices	3/112	0.000520781	0.013327255	0.009543496	HMOX1/BAK1/NT5E	3
DOID:655	inherited metabolic disorder	13/331	0.000628281	0.014932569	0.010693043	MPO/HMOX1/BCAP31/ASS1/C3/SOD2/ICAM1/NPC2/OPLAH/SLC6A4/GLA/GLB1/NAGA	13
DOID:526	Human immunodeficiency virus infectious disease	9/173	0.000636557	0.014932569	0.010693043	HP/SOD2/PCNA/ICAM1/ITGB2/IDH1/MRC1/FUCA1/GLB1	9
DOID:374	nutrition disease	13/338	0.000764272	0.017211409	0.012324894	LBP/HP/LCN2/CTSK/C3/SOD2/TLR2/ICAM1/ITGB2/SLC2A1/COMT/SLC6A4/CTSS	13
DOID:3908	non-small cell lung carcinoma	15/431	0.000840124	0.017649003	0.01263825	ITGA5/HMOX1/KPNA2/ITGAM/ANPEP/DNMT1/TOP2A/MSR1/SOD2/RRM1/PCNA/SLC2A1/DUSP3/EPCAM/PAG1	15
DOID:1247	blood coagulation disease	9/180	0.0008464	0.017649003	0.01263825	LCN2/HMOX1/ITGAM/CD177/ELANE/TLR2/ICAM1/ITGB2/IDH1	9
DOID:0050890	synucleinopathy	10/220	0.000913093	0.018359698	0.013147171	HP/HMOX1/SQSTM1/GCH1/C3/ICAM1/CD200/CAPN1/COMT/SLC6A4	10
DOID:2228	thrombocytosis	4/33	0.001050011	0.019520656	0.01397852	LCN2/CD177/ICAM1/IDH1	4
DOID:2320	obstructive lung disease	12/308	0.001099182	0.019520656	0.01397852	HMOX1/EIF2AK2/ITGAM/MSR1/SOD2/CAMP/PCNA/TLR2/ICAM1/ITGB2/SLC6A4/CTSS	12
DOID:14330	Parkinson's disease	9/187	0.001109522	0.019520656	0.01397852	HP/HMOX1/SQSTM1/GCH1/C3/CD200/CAPN1/COMT/SLC6A4	9
DOID:8398	osteoarthritis	9/187	0.001109522	0.019520656	0.01397852	LCN2/HMOX1/ITGAM/SOD2/ITGB2/SLC2A1/ANP32A/CTSS/IKBKB	9
DOID:4989	pancreatitis	7/117	0.001153105	0.019672676	0.014087379	MPO/LCN2/GCH1/LTF/SOD2/TLR2/ICAM1	7
DOID:2723	dermatitis	9/189	0.001195794	0.019800949	0.014179234	HMOX1/SQSTM1/IRAK3/DNMT1/LTF/CAMP/TLR2/ICAM1/SLC6A4	9
DOID:5517	stomach carcinoma	8/153	0.001239124	0.019932202	0.014273223	HK2/HMOX1/TOP2A/PLXNA1/SOD2/PCNA/ICAM1/SLC2A1	8
DOID:1116	pertussis	4/35	0.00131528	0.020343487	0.01456774	ITGAM/ITGA5/ICAM1/ITGB2	4
DOID:824	periodontitis	7/120	0.001336961	0.020343487	0.01456774	MPO/LTF/ELANE/CAMP/TLR2/CTSC/SLC6A4	7
DOID:1074	kidney failure	8/156	0.00140376	0.02079781	0.014893075	MPO/HP/LCN2/ITGAM/C3/ICAM1/ITGB2/SLC2A1	8
DOID:612	primary immunodeficiency disease	9/196	0.001541528	0.022253346	0.015935368	TAPBP/C3/TLR2/CYBB/ITGB2/CTSC/EPCAM/SLC6A4/FCGRT	9
DOID:0050338	primary bacterial infectious disease	10/238	0.001655186	0.023296749	0.016682537	HP/ITGA5/LCN2/C3/ESD/CAMP/TLR2/ICAM1/MRC1/LTA4H	10
DOID:302	substance abuse	3/18	0.001818023	0.024964554	0.017876833	ANPEP/COMT/SLC6A4	3
DOID:688	embryonal cancer	13/373	0.001874903	0.025132625	0.017997187	LCN2/KPNA2/SQSTM1/ASS1/DNMT1/SOD2/MAD2L1/RRM1/PCNA/SLC2A1/EPCAM/FMNL1/PLCB2	13
DOID:0050339	commensal bacterial infectious disease	4/40	0.002176961	0.027998798	0.020049621	ITGAM/ITGA5/ICAM1/ITGB2	4
DOID:0050737	autosomal recessive disease	12/334	0.002188183	0.027998798	0.020049621	MPO/LCN2/HMOX1/LTF/ELANE/BAK1/CAMP/TLR2/ICAM1/ITGB2/MRC1/SYNE2	12
DOID:1532	pleural disease	3/20	0.002489207	0.029397755	0.021051398	HMOX1/TLR2/ICAM1	3
DOID:4676	uremia	3/20	0.002489207	0.029397755	0.021051398	ITGAM/ITGB2/SLC2A1	3
DOID:799	varicose veins	3/20	0.002489207	0.029397755	0.021051398	HMOX1/BAK1/NT5E	3
DOID:26	pancreas disease	8/171	0.002506381	0.029397755	0.021051398	MPO/LCN2/GCH1/LTF/SOD2/TLR2/ICAM1/SLC2A1	8
DOID:1485	cystic fibrosis	7/138	0.00297128	0.03356928	0.02403858	MPO/HMOX1/ELANE/CAMP/TLR2/ICAM1/MRC1	7
DOID:12365	malaria	6/103	0.002981286	0.03356928	0.02403858	HP/HMOX1/TLR2/ICAM1/CYBB/CAPN1	6
DOID:3388	periodontal disease	7/139	0.003093743	0.034152498	0.024456216	MPO/LTF/ELANE/CAMP/TLR2/CTSC/SLC6A4	7
DOID:631	fibromyalgia	3/22	0.003295603	0.035134814	0.02515964	ITGAM/COMT/SLC6A4	3
DOID:0080005	bone remodeling disease	7/141	0.003350246	0.035134814	0.02515964	HP/SQSTM1/CTSK/LTF/ICAM1/TALDO1/PTK2B	7
DOID:4766	embryoma	12/352	0.003369947	0.035134814	0.02515964	LCN2/KPNA2/SQSTM1/ASS1/SOD2/MAD2L1/RRM1/PCNA/SLC2A1/EPCAM/FMNL1/PLCB2	12
DOID:552	pneumonia	6/108	0.003773853	0.038630533	0.027662885	HMOX1/IRAK3/CTSK/ELANE/CASP6/IKBKB	6
DOID:2394	ovarian cancer	11/312	0.003865835	0.03886545	0.027831106	LCN2/KPNA2/ANPEP/CAMP/TK1/SLC2A1/CD200/CFL1/EPCAM/IQGAP1/TNFAIP8L2	11
DOID:120	female reproductive organ cancer	14/455	0.003951741	0.039032109	0.02795045	LCN2/KPNA2/ANPEP/TOP2A/SOD2/CAMP/PCNA/TK1/SLC2A1/CD200/CFL1/EPCAM/IQGAP1/TNFAIP8L2	14
DOID:6543	acne	3/24	0.004245156	0.039938906	0.028599796	LCN2/ANPEP/TLR2	3
DOID:9098	sebaceous gland disease	3/24	0.004245156	0.039938906	0.028599796	LCN2/ANPEP/TLR2	3
DOID:2994	germ cell cancer	13/410	0.004256367	0.039938906	0.028599796	LCN2/KPNA2/SQSTM1/ASS1/DNMT1/SOD2/MAD2L1/RRM1/PCNA/SLC2A1/EPCAM/FMNL1/PLCB2	13
DOID:403	mouth disease	8/188	0.004476275	0.041313818	0.029584355	MPO/LCN2/LTF/ELANE/CAMP/TLR2/CTSC/SLC6A4	8
DOID:13515	tuberous sclerosis	3/25	0.004775837	0.042679308	0.030562167	PCNA/ICAM1/IKBKB	3
DOID:687	hepatoblastoma	3/25	0.004775837	0.042679308	0.030562167	MPO/HMOX1/PCNA	3
DOID:2213	hemorrhagic disease	7/152	0.005063292	0.043100776	0.030863975	LCN2/HMOX1/CD177/TLR2/ICAM1/ITGB2/IDH1	7
DOID:3310	atopic dermatitis	7/152	0.005063292	0.043100776	0.030863975	HMOX1/SQSTM1/IRAK3/DNMT1/CAMP/TLR2/SLC6A4	7
DOID:633	myositis	5/81	0.005195253	0.043100776	0.030863975	ITGAM/SQSTM1/TLR2/COMT/SLC6A4	5
DOID:9074	systemic lupus erythematosus	5/81	0.005195253	0.043100776	0.030863975	LCN2/ITGAM/IRF5/SOD2/ICAM1	5
DOID:5844	myocardial infarction	10/279	0.005205778	0.043100776	0.030863975	MPO/HP/LCN2/HMOX1/C3/ELANE/TLR2/ICAM1/CTSD/SLC6A4	10
DOID:9471	meningitis	3/26	0.00534486	0.043610962	0.031229314	MPO/TLR2/ICAM1	3
DOID:219	colon cancer	10/282	0.005606784	0.045094561	0.032291702	ITGA5/LCN2/HMOX1/MSR1/LGALS3BP/SOD2/ICAM1/CD200/EPCAM/CASP6	10
DOID:18	urinary system disease	14/478	0.00609487	0.048329741	0.034608378	MPO/HP/LCN2/HMOX1/ITGAM/IRF5/C3/SOD2/PCNA/ICAM1/DDX58/ITGB2/SLC2A1/CFL1	14
DOID:9256	colorectal cancer	10/287	0.006328639	0.049486439	0.035436676	ITGA5/LCN2/HMOX1/MSR1/LGALS3BP/SOD2/ICAM1/CD200/EPCAM/CASP6	10
DOID:5672	large intestine cancer	10/288	0.006481352	0.049986319	0.035794634	ITGA5/LCN2/HMOX1/MSR1/LGALS3BP/SOD2/ICAM1/CD200/EPCAM/CASP6	10
DOID:2355	anemia	9/244	0.006628738	0.05020175	0.035948902	MPO/LCN2/EIF2AK2/CFB/LTF/C3/ICAM1/SLC2A1/CAPN1	9
DOID:13241	Behcet's disease	5/86	0.006687622	0.05020175	0.035948902	HMOX1/IRF5/LGALS3BP/SOD2/ICAM1	5
DOID:865	vasculitis	6/122	0.006823443	0.050547348	0.036196381	MPO/HMOX1/IRF5/LGALS3BP/SOD2/ICAM1	6
DOID:8857	lupus erythematosus	5/87	0.007018658	0.051318239	0.036748407	LCN2/ITGAM/IRF5/SOD2/ICAM1	5
DOID:1091	tooth disease	7/162	0.007129772	0.051462332	0.03685159	MPO/LTF/ELANE/CAMP/TLR2/CTSC/SLC6A4	7
DOID:0050904	salivary gland carcinoma	4/57	0.007861086	0.054723265	0.039186708	DNMT1/PCNA/SLC2A1/CTSD	4
DOID:1936	atherosclerosis	11/344	0.007953853	0.054723265	0.039186708	MPO/HMOX1/ELANE/OSBPL8/SOD2/CAMP/TLR2/ICAM1/NCEH1/SLC6A4/CTSS	11
DOID:0050598	extrapulmonary tuberculosis	2/110	0.007970351	0.054723265	0.039186708	TLR2/ICAM1	2
DOID:106	pleural tuberculosis	2/110	0.007970351	0.054723265	0.039186708	TLR2/ICAM1	2
DOID:2348	arteriosclerotic cardiovascular disease	11/345	0.008121598	0.055089873	0.039449231	MPO/HMOX1/ELANE/OSBPL8/SOD2/CAMP/TLR2/ICAM1/NCEH1/SLC6A4/CTSS	11
DOID:2789	parasitic protozoa infectious disease	6/127	0.008255758	0.055333238	0.039623502	HP/HMOX1/TLR2/ICAM1/CYBB/CAPN1	6
DOID:8850	salivary gland cancer	4/58	0.008354899	0.055338919	0.039627571	DNMT1/PCNA/SLC2A1/CTSD	4
DOID:10155	intestinal cancer	10/300	0.008547581	0.055883385	0.040017456	ITGA5/LCN2/HMOX1/MSR1/LGALS3BP/SOD2/ICAM1/CD200/EPCAM/CASP6	10
DOID:3393	coronary artery disease	11/348	0.008641467	0.055883385	0.040017456	MPO/HP/LCN2/HMOX1/C3/ELANE/SOD2/TLR2/ICAM1/CTSD/SLC6A4	11
DOID:423	myopathy	12/398	0.008834141	0.055883385	0.040017456	LCN2/EIF2AK2/ITGAM/SQSTM1/SOD2/B4GALT1/TLR2/CAPN1/COMT/SLC6A4/SYNE2/LPIN1	12
DOID:66	muscle tissue disease	12/398	0.008834141	0.055883385	0.040017456	LCN2/EIF2AK2/ITGAM/SQSTM1/SOD2/B4GALT1/TLR2/CAPN1/COMT/SLC6A4/SYNE2/LPIN1	12
DOID:0050825	endocardium disease	2/111	0.00965386	0.059077429	0.042304675	LBP/PLCB2	2
DOID:11504	autonomic neuropathy	2/111	0.00965386	0.059077429	0.042304675	RETREG1/DNMT1	2
DOID:1586	rheumatic fever	2/111	0.00965386	0.059077429	0.042304675	TLR2/ICAM1	2
DOID:936	brain disease	13/454	0.009800742	0.059331372	0.042486521	HP/BCAP31/EIF2AK2/GCH1/LTF/C3/B4GALT1/ICAM1/ITGB2/SLC2A1/CTSD/SLC6A4/GLB1	13
DOID:8618	oral cavity cancer	4/61	0.009957122	0.059636803	0.042705236	DNMT1/PCNA/SLC2A1/CTSD	4
DOID:2349	arteriosclerosis	11/356	0.010155085	0.060182241	0.043095818	MPO/HMOX1/ELANE/OSBPL8/SOD2/CAMP/TLR2/ICAM1/NCEH1/SLC6A4/CTSS	11
DOID:11476	osteoporosis	5/96	0.010529547	0.061114793	0.043763608	HP/CTSK/LTF/ICAM1/PTK2B	5
DOID:2218	blood platelet disease	5/96	0.010529547	0.061114793	0.043763608	LCN2/CD177/ICAM1/ITGB2/IDH1	5
DOID:0080000	muscular disease	12/408	0.010643247	0.061144371	0.043784788	LCN2/EIF2AK2/ITGAM/SQSTM1/SOD2/B4GALT1/TLR2/CAPN1/COMT/SLC6A4/SYNE2/LPIN1	12
DOID:0080011	bone resorption disease	5/97	0.010982084	0.062242016	0.044570799	HP/CTSK/LTF/ICAM1/PTK2B	5
DOID:557	kidney disease	13/461	0.01105542	0.062242016	0.044570799	MPO/HP/LCN2/HMOX1/ITGAM/IRF5/C3/SOD2/ICAM1/DDX58/ITGB2/SLC2A1/CFL1	13
DOID:6196	reactive arthritis	2/112	0.011480476	0.063995131	0.045826185	SOD2/TLR2	2
DOID:1793	pancreatic cancer	10/319	0.012816793	0.070743672	0.050658739	MPO/LCN2/DNMT1/C3/TOP2A/SOD2/RRM1/PCNA/EPCAM/IKBKB	10
DOID:6132	bronchitis	2/13	0.013445981	0.072789302	0.052123591	EIF2AK2/TLR2	2
DOID:841	extrinsic allergic alveolitis	2/13	0.013445981	0.072789302	0.052123591	IRF5/CTSK	2
DOID:1443	cerebral degeneration	4/67	0.013731199	0.073625381	0.052722298	BCAP31/B4GALT1/SLC6A4/GLB1	4
DOID:576	proteinuria	4/68	0.014437157	0.076680374	0.054909943	HP/HMOX1/C3/CFL1	4
DOID:866	vein disease	3/38	0.015382035	0.080298493	0.057500837	HMOX1/BAK1/NT5E	3
DOID:1883	hepatitis C	8/233	0.015404014	0.080298493	0.057500837	LCN2/HMOX1/EIF2AK2/MSR1/SOD2/TLR2/ICAM1/DDX58	8
DOID:11247	disseminated intravascular coagulation	2/14	0.015546245	0.080298493	0.057500837	ELANE/TLR2	2
DOID:10952	nephritis	6/147	0.016179865	0.082811493	0.059300368	MPO/LCN2/IRF5/SOD2/ICAM1/DDX58	6
DOID:10871	age related macular degeneration	4/72	0.017489448	0.086280829	0.06178472	CFB/C3/SOD2/ICAM1	4
DOID:2007	degeneration of macula and posterior pole	4/72	0.017489448	0.086280829	0.06178472	CFB/C3/SOD2/ICAM1	4
DOID:4866	salivary gland adenoid cystic carcinoma	3/40	0.017660092	0.086280829	0.06178472	DNMT1/PCNA/CTSD	3
DOID:1398	parasitic infectious disease	6/150	0.017707622	0.086280829	0.06178472	HP/HMOX1/TLR2/ICAM1/CYBB/CAPN1	6
DOID:11465	autonomic nervous system disease	2/15	0.017777222	0.086280829	0.06178472	RETREG1/DNMT1	2
DOID:12129	bulimia nervosa	2/15	0.017777222	0.086280829	0.06178472	COMT/SLC6A4	2
DOID:1024	leprosy	3/41	0.018865874	0.089871438	0.064355914	TLR2/MRC1/LTA4H	3
DOID:8432	polycythemia	3/41	0.018865874	0.089871438	0.064355914	LCN2/CD177/IDH1	3
DOID:4448	macular degeneration	4/74	0.019155546	0.089871438	0.064355914	CFB/C3/SOD2/ICAM1	4
DOID:574	peripheral nervous system disease	4/74	0.019155546	0.089871438	0.064355914	RETREG1/DNMT1/COMT/SLC6A4	4
DOID:10923	sickle cell anemia	3/42	0.020116305	0.09141919	0.065464242	MPO/LTF/ICAM1	3
DOID:3298	vaccinia	3/42	0.020116305	0.09141919	0.065464242	EIF2AK2/BAK1/DUSP3	3
DOID:8469	influenza	5/113	0.020118977	0.09141919	0.065464242	EIF2AK2/ICAM1/DDX58/IPO5/IKBKB	5
DOID:2526	prostate adenocarcinoma	2/16	0.020134955	0.09141919	0.065464242	SQSTM1/SOD2	2
DOID:9778	irritable bowel syndrome	4/76	0.020916922	0.093841639	0.06719893	TLR2/ICAM1/COMT/SLC6A4	4
DOID:1192	peripheral nervous system neoplasm	11/396	0.021001859	0.093841639	0.06719893	HMOX1/SQSTM1/TOP2A/LGALS3BP/BAK1/SOD2/MAD2L1/SLC2A1/COMT/CTSD/CFL1	11
DOID:4961	bone marrow disease	3/43	0.021411456	0.0949185	0.067970058	LCN2/CD177/IDH1	3
DOID:76	stomach disease	4/77	0.021833752	0.096034392	0.068769135	MPO/SLC7A2/TLR2/COMT	4
DOID:2055	post-traumatic stress disorder	2/17	0.022615565	0.097038013	0.069487817	COMT/SLC6A4	2
DOID:84	osteochondritis dissecans	2/17	0.022615565	0.097038013	0.069487817	COMT/SLC6A4	2
DOID:9675	pulmonary emphysema	2/17	0.022615565	0.097038013	0.069487817	PCNA/CTSS	2
DOID:10603	glucose intolerance	3/44	0.022751364	0.097038013	0.069487817	HMOX1/CFB/ICAM1	3
DOID:2921	glomerulonephritis	4/79	0.02374044	0.100495247	0.071963503	MPO/LCN2/SOD2/ICAM1	4
DOID:3262	phagocyte bactericidal dysfunction	2/18	0.025215258	0.103621827	0.074202411	CYBB/ITGB2	2
DOID:3479	uveal cancer	2/18	0.025215258	0.103621827	0.074202411	PCNA/ICAM1	2
DOID:4248	coronary stenosis	2/18	0.025215258	0.103621827	0.074202411	TLR2/ICAM1	2
DOID:6039	uveal melanoma	2/18	0.025215258	0.103621827	0.074202411	PCNA/ICAM1	2
DOID:10930	borderline personality disorder	2/19	0.027930318	0.112319779	0.080430916	COMT/SLC6A4	2
DOID:12132	Wegener's granulomatosis	2/19	0.027930318	0.112319779	0.080430916	MPO/IRF5	2
DOID:9206	Barrett's esophagus	2/19	0.027930318	0.112319779	0.080430916	SOD2/MAD2L1	2
DOID:8466	retinal degeneration	8/261	0.028207413	0.1126296	0.080652775	CFB/C3/CA4/BAK1/SOD2/TLR2/ICAM1/CAPN1	8
DOID:9352	type 2 diabetes mellitus	7/215	0.029521453	0.117046325	0.083815542	MPO/ITGAM/IRF5/LTF/SOD2/ICAM1/ITGB2	7
DOID:3328	temporal lobe epilepsy	3/49	0.030121612	0.118590682	0.084921438	C3/CTSD/SLC6A4	3
DOID:12140	Chagas disease	2/20	0.030757108	0.119422426	0.085517041	HP/TLR2	2
DOID:1510	personality disorder	2/20	0.030757108	0.119422426	0.085517041	COMT/SLC6A4	2
DOID:627	severe combined immunodeficiency	3/50	0.031729294	0.122353373	0.087615859	TAPBP/EPCAM/SLC6A4	3
DOID:201	connective tissue cancer	10/370	0.032132132	0.122661465	0.087836479	SQSTM1/ASS1/CTSK/TOP2A/PLXNA1/SOD2/MAD2L1/ICAM1/SLC2A1/IDH1	10
DOID:10283	prostate cancer	11/425	0.033064736	0.122661465	0.087836479	MPO/ITGA5/SQSTM1/MSR1/SOD2/PCNA/ICAM1/CAPN1/COMT/IKBKB/ASAH1	11
DOID:4948	gallbladder carcinoma	3/51	0.033381232	0.122661465	0.087836479	TOP2A/SLC2A1/EPCAM	3
DOID:1040	chronic lymphocytic leukemia	7/221	0.033572671	0.122661465	0.087836479	EIF2AK2/ANPEP/DPP9/FMNL1/CD2/NT5E/IKBKB	7
DOID:10113	trypanosomiasis	2/21	0.033692068	0.122661465	0.087836479	HP/TLR2	2
DOID:3087	gingivitis	2/21	0.033692068	0.122661465	0.087836479	MPO/TLR2	2
DOID:4752	multiple system atrophy	2/21	0.033692068	0.122661465	0.087836479	SQSTM1/ICAM1	2
DOID:8283	peritonitis	2/21	0.033692068	0.122661465	0.087836479	LCN2/ELANE	2
DOID:3213	demyelinating disease	6/175	0.034425298	0.122661465	0.087836479	MPO/HMOX1/IRF5/C3/ICAM1/ITGB2	6
DOID:2621	autonomic nervous system neoplasm	10/375	0.034766047	0.122661465	0.087836479	HMOX1/SQSTM1/TOP2A/LGALS3BP/BAK1/SOD2/MAD2L1/COMT/CTSD/CFL1	10
DOID:769	neuroblastoma	10/375	0.034766047	0.122661465	0.087836479	HMOX1/SQSTM1/TOP2A/LGALS3BP/BAK1/SOD2/MAD2L1/COMT/CTSD/CFL1	10
DOID:0070004	myeloma	9/323	0.034907118	0.122661465	0.087836479	ITGA5/LCN2/DNMT1/CD177/SOD2/PCNA/ICAM1/SLC2A1/IDH1	9
DOID:1036	chronic leukemia	7/223	0.035001888	0.122661465	0.087836479	MPO/LCN2/IRF5/ANPEP/SQSTM1/CD200/CD2	7
DOID:3121	gallbladder cancer	3/52	0.035077257	0.122661465	0.087836479	TOP2A/SLC2A1/EPCAM	3
DOID:628	combined T cell and B cell immunodeficiency	3/52	0.035077257	0.122661465	0.087836479	TAPBP/EPCAM/SLC6A4	3
DOID:2237	hepatitis	11/431	0.036076943	0.125378513	0.089782127	LCN2/HMOX1/EIF2AK2/DNMT1/MSR1/SOD2/B4GALT1/TLR2/ICAM1/DDX58/TNFAIP8L2	11
DOID:10933	obsessive-compulsive disorder	2/22	0.036731715	0.126870893	0.090850803	COMT/SLC6A4	2
DOID:4960	bone marrow cancer	9/328	0.037939177	0.13024242	0.093265115	ITGA5/LCN2/DNMT1/CD177/SOD2/PCNA/ICAM1/SLC2A1/IDH1	9
DOID:3856	male reproductive organ cancer	11/435	0.038190234	0.130309708	0.093313299	MPO/ITGA5/SQSTM1/MSR1/SOD2/PCNA/ICAM1/CAPN1/COMT/IKBKB/ASAH1	11
DOID:9408	acute myocardial infarction	4/92	0.03856444	0.130793854	0.093659991	MPO/HP/HMOX1/ELANE	4
DOID:3459	breast carcinoma	10/383	0.03929066	0.132458931	0.094852333	ITGA5/KPNA2/SQSTM1/TOP2A/PLXNA1/SOD2/MAD2L1/ICAM1/SLC2A1/COMT	10
DOID:12554	hemolytic-uremic syndrome	2/23	0.039872638	0.132830148	0.095118158	CFB/C3	2
DOID:4914	esophagus adenocarcinoma	2/23	0.039872638	0.132830148	0.095118158	SOD2/EPCAM	2
DOID:0060100	musculoskeletal system cancer	11/439	0.040389435	0.13310447	0.095314597	SQSTM1/ASS1/CTSK/TOP2A/PLXNA1/SOD2/MAD2L1/ICAM1/SLC2A1/IDH1/CAPN1	11
DOID:11162	respiratory failure	3/55	0.040427823	0.13310447	0.095314597	LBP/ELANE/SOD2	3
DOID:3717	gastric adenocarcinoma	4/94	0.041225044	0.134940116	0.096629082	HK2/HMOX1/TOP2A/PCNA	4
DOID:127	leiomyoma	4/95	0.042593619	0.13808388	0.098880296	MPO/BAK1/PCNA/COMT	4
DOID:1037	lymphoblastic leukemia	11/443	0.042676013	0.13808388	0.098880296	MPO/EIF2AK2/ITGAM/ANPEP/DNMT1/TOP2A/DPP9/FMNL1/CD2/NT5E/IKBKB	11
DOID:4195	hyperglycemia	5/139	0.043591259	0.140239308	0.100423773	HMOX1/CFB/TLR2/ICAM1/SLC2A1	5
DOID:2151	malignant ovarian surface epithelial-stromal neoplasm	8/286	0.044694617	0.141365559	0.101230268	KPNA2/ANPEP/TK1/SLC2A1/CFL1/EPCAM/IQGAP1/TNFAIP8L2	8
DOID:2152	ovary epithelial cancer	8/286	0.044694617	0.141365559	0.101230268	KPNA2/ANPEP/TK1/SLC2A1/CFL1/EPCAM/IQGAP1/TNFAIP8L2	8
DOID:4001	ovarian carcinoma	8/286	0.044694617	0.141365559	0.101230268	KPNA2/ANPEP/TK1/SLC2A1/CFL1/EPCAM/IQGAP1/TNFAIP8L2	8
DOID:14069	cerebral malaria	2/25	0.046445036	0.146081313	0.104607166	HMOX1/ICAM1	2
DOID:2234	focal epilepsy	3/59	0.048165159	0.150649913	0.107878689	C3/CTSD/SLC6A4	3
DOID:583	hemolytic anemia	3/60	0.050205293	0.155305384	0.111212418	CFB/C3/SLC2A1	3
DOID:720	normocytic anemia	3/60	0.050205293	0.155305384	0.111212418	CFB/C3/SLC2A1	3
DOID:341	peripheral vascular disease	3/61	0.052287095	0.16086139	0.115191011	GCH1/BAK1/ICAM1	3
DOID:1724	duodenal ulcer	2/27	0.053383417	0.163341652	0.116967099	MPO/TLR2	2
DOID:8670	eating disorder	2/28	0.056982079	0.171721055	0.122967493	COMT/SLC6A4	2
DOID:9446	cholangitis	2/28	0.056982079	0.171721055	0.122967493	TLR2/ICAM1	2
DOID:1307	dementia	5/150	0.057037011	0.171721055	0.122967493	SQSTM1/RETREG1/DNMT1/COMT/SLC6A4	5
DOID:303	substance-related disorder	3/64	0.058778909	0.176024074	0.126048837	ANPEP/COMT/SLC6A4	3
DOID:5679	retinal disease	9/358	0.059960445	0.178612332	0.127902259	ITGA5/CFB/C3/CA4/BAK1/SOD2/TLR2/ICAM1/CAPN1	9
DOID:1389	polyneuropathy	2/29	0.060663042	0.179754172	0.128719918	COMT/SLC6A4	2
DOID:1176	bronchial disease	5/153	0.061076397	0.180031475	0.128918491	EIF2AK2/SOD2/CAMP/TLR2/ICAM1	5
DOID:1686	glaucoma	4/109	0.064418879	0.188894942	0.135265519	BAK1/SOD2/TLR2/CAPN1	4
DOID:299	adenocarcinoma	5/158	0.06816275	0.196074036	0.140406386	SOD2/PCNA/SLC2A1/EPCAM/ASAH1	5
DOID:11394	adult respiratory distress syndrome	2/31	0.068260233	0.196074036	0.140406386	LBP/ELANE	2
DOID:8029	sporadic breast cancer	2/31	0.068260233	0.196074036	0.140406386	SOD2/COMT	2
DOID:9744	type 1 diabetes mellitus	2/31	0.068260233	0.196074036	0.140406386	TLR2/SLC2A1	2
DOID:12894	Sjogren's syndrome	3/69	0.070396399	0.201183618	0.1440653	IRF5/BAK1/ICAM1	3
DOID:0060085	organ system benign neoplasm	7/262	0.07124011	0.202566577	0.145055621	MPO/LCN2/CTSK/PCNA/SLC2A1/COMT/EPCAM	7
DOID:13375	temporal arteritis	2/32	0.072170797	0.203002658	0.145367894	IRF5/ICAM1	2
DOID:525	central nervous system vasculitis	2/32	0.072170797	0.203002658	0.145367894	IRF5/ICAM1	2
DOID:4074	pancreas adenocarcinoma	5/161	0.072625986	0.203002658	0.145367894	LCN2/C3/TOP2A/EPCAM/IKBKB	5
DOID:784	chronic kidney failure	3/70	0.072835767	0.203002658	0.145367894	MPO/HP/ICAM1	3
DOID:0060121	integumentary system benign neoplasm	2/33	0.076152336	0.20711964	0.148316017	CTSK/SLC2A1	2
DOID:1227	neutropenia	2/33	0.076152336	0.20711964	0.148316017	ELANE/CAMP	2
DOID:12987	agranulocytosis	2/33	0.076152336	0.20711964	0.148316017	ELANE/CAMP	2
DOID:1483	gingival disease	2/33	0.076152336	0.20711964	0.148316017	MPO/TLR2	2
DOID:3165	skin benign neoplasm	2/33	0.076152336	0.20711964	0.148316017	CTSK/SLC2A1	2
DOID:5409	lung small cell carcinoma	3/72	0.077826767	0.210656105	0.15084844	MPO/RRM1/ICAM1	3
DOID:811	lipodystrophy	2/34	0.080202172	0.215488133	0.154308601	C3/LPIN1	2
DOID:6364	migraine	3/73	0.080377457	0.215488133	0.154308601	ICAM1/ITGB2/SLC6A4	3
DOID:3683	lung benign neoplasm	2/35	0.084317687	0.224980369	0.161105883	MPO/SLC2A1	2
DOID:5082	liver cirrhosis	6/220	0.084764405	0.225105473	0.161195468	MPO/SOD2/PCNA/TLR2/ICAM1/TALDO1	6
DOID:2377	multiple sclerosis	5/169	0.085294338	0.225449353	0.161441717	MPO/HMOX1/IRF5/C3/ICAM1	5
DOID:0050621	respiratory system benign neoplasm	2/36	0.088496321	0.229601053	0.164414702	MPO/SLC2A1	2
DOID:5158	pleural cancer	2/36	0.088496321	0.229601053	0.164414702	PLXNA1/SOD2	2
DOID:594	panic disorder	2/36	0.088496321	0.229601053	0.164414702	COMT/SLC6A4	2
DOID:7474	malignant pleural mesothelioma	2/36	0.088496321	0.229601053	0.164414702	PLXNA1/SOD2	2
DOID:10591	pre-eclampsia	7/278	0.09088959	0.233778148	0.167405872	HP/LCN2/HMOX1/SOD2/TLR2/ICAM1/COMT	7
DOID:6432	pulmonary hypertension	3/77	0.090936793	0.233778148	0.167405872	HMOX1/PCNA/SLC6A4	3
DOID:1596	mental depression	2/38	0.097032989	0.246079156	0.176214484	COMT/SLC6A4	2
DOID:3713	ovary adenocarcinoma	2/38	0.097032989	0.246079156	0.176214484	IQGAP1/TNFAIP8L2	2
DOID:883	parasitic helminthiasis infectious disease	2/38	0.097032989	0.246079156	0.176214484	TLR2/ICAM1	2
DOID:6000	congestive heart failure	6/229	0.09810006	0.247669659	0.177353425	MPO/LCN2/HMOX1/ICAM1/SLC2A1/SLC6A4	6
DOID:3910	lung adenocarcinoma	5/178	0.100850098	0.252349356	0.180704503	ITGA5/HMOX1/MSR1/SOD2/RRM1	5
DOID:4607	biliary tract cancer	5/178	0.100850098	0.252349356	0.180704503	LCN2/DNMT1/TOP2A/SLC2A1/EPCAM	5
DOID:28	endocrine system disease	9/399	0.101366492	0.25251918	0.180826112	MPO/LCN2/GCH1/LTF/BAK1/SOD2/TLR2/ICAM1/SLC2A1	9
DOID:5157	benign pleural mesothelioma	2/41	0.110250614	0.273440949	0.195807953	PLXNA1/SOD2	2
DOID:4905	pancreatic carcinoma	6/237	0.11084337	0.273705338	0.195997279	LCN2/DNMT1/C3/TOP2A/EPCAM/IKBKB	6
DOID:2841	asthma	4/134	0.115174142	0.283157388	0.202765784	SOD2/CAMP/TLR2/ICAM1	4
DOID:4138	bile duct disease	3/86	0.116641687	0.285518563	0.204456595	HMOX1/TLR2/ICAM1	3
DOID:0080014	chromosomal disease	4/135	0.117493012	0.286357427	0.205057296	C3/CAMP/PCNA/COMT	4
DOID:0060095	uterine benign neoplasm	2/43	0.119310786	0.287880178	0.20614772	PCNA/COMT	2
DOID:13223	uterine fibroid	2/43	0.119310786	0.287880178	0.20614772	PCNA/COMT	2
DOID:9741	biliary tract disease	3/87	0.119651797	0.287880178	0.20614772	HMOX1/TLR2/ICAM1	3
DOID:184	bone cancer	6/243	0.120935024	0.289729441	0.207471956	SQSTM1/ASS1/SOD2/MAD2L1/SLC2A1/IDH1	6
DOID:0060084	cell type benign neoplasm	10/475	0.121896699	0.290092919	0.207732239	MPO/HMOX1/TOP2A/PLXNA1/BAK1/SOD2/PCNA/SLC2A1/COMT/CTSS	10
DOID:0060116	sensory system cancer	4/139	0.12697096	0.290092919	0.207732239	PCNA/ICAM1/EPCAM/ANP32A	4
DOID:2174	ocular cancer	4/139	0.12697096	0.290092919	0.207732239	PCNA/ICAM1/EPCAM/ANP32A	4
DOID:0060086	female reproductive organ benign neoplasm	2/45	0.12854945	0.290092919	0.207732239	PCNA/COMT	2
DOID:0080008	ischemic bone disease	2/45	0.12854945	0.290092919	0.207732239	COMT/SLC6A4	2
DOID:3113	papillary carcinoma	2/45	0.12854945	0.290092919	0.207732239	MAD2L1/SLC2A1	2
DOID:0050589	inflammatory bowel disease	3/90	0.128852807	0.290092919	0.207732239	ICAM1/ITGB2/SLC6A4	3
DOID:229	female reproductive system disease	5/193	0.129691728	0.290092919	0.207732239	MPO/LTF/SOD2/TLR2/ICAM1	5
DOID:1080	filariasis	1/110	0.130361472	0.290092919	0.207732239	TLR2	1
DOID:10908	hydrocephalus	1/110	0.130361472	0.290092919	0.207732239	B4GALT1	1
DOID:1159	functional gastric disease	1/110	0.130361472	0.290092919	0.207732239	COMT	1
DOID:14256	adult-onset Still's disease	1/110	0.130361472	0.290092919	0.207732239	HMOX1	1
DOID:2438	dermis tumor	1/110	0.130361472	0.290092919	0.207732239	CTSK	1
DOID:2738	pseudoxanthoma elasticum	1/110	0.130361472	0.290092919	0.207732239	ICAM1	1
DOID:3179	inverted papilloma	1/110	0.130361472	0.290092919	0.207732239	CTSS	1
DOID:4418	cutaneous fibrous histiocytoma	1/110	0.130361472	0.290092919	0.207732239	CTSK	1
DOID:5394	prolactinoma	1/110	0.130361472	0.290092919	0.207732239	PCNA	1
DOID:9993	hypoglycemia	1/110	0.130361472	0.290092919	0.207732239	SLC2A1	1
DOID:10608	celiac disease	3/91	0.131974867	0.292526969	0.209475235	HP/BAK1/ICAM1	3
DOID:8692	myeloid leukemia	4/142	0.134285757	0.296481888	0.212307307	MPO/LCN2/ITGAM/CAMP	4
DOID:0050622	reproductive organ benign neoplasm	2/47	0.137950138	0.301057796	0.215584063	PCNA/COMT	2
DOID:615	leukopenia	2/47	0.137950138	0.301057796	0.215584063	ELANE/CAMP	2
DOID:2043	hepatitis B	5/197	0.137962542	0.301057796	0.215584063	HMOX1/EIF2AK2/DNMT1/TLR2/TNFAIP8L2	5
DOID:2089	constipation	1/111	0.142432233	0.30606621	0.219170531	SLC6A4	1
DOID:3507	dermatofibrosarcoma protuberans	1/111	0.142432233	0.30606621	0.219170531	CTSK	1
DOID:4988	alcoholic pancreatitis	1/111	0.142432233	0.30606621	0.219170531	SOD2	1
DOID:9779	bowel dysfunction	1/111	0.142432233	0.30606621	0.219170531	SLC6A4	1
DOID:1826	epilepsy syndrome	5/201	0.146463066	0.310742234	0.222518979	HP/C3/SLC2A1/CTSD/SLC6A4	5
DOID:10579	leukodystrophy	2/49	0.147497142	0.310742234	0.222518979	BCAP31/SLC6A4	2
DOID:4971	myelofibrosis	2/49	0.147497142	0.310742234	0.222518979	SLC2A1/IDH1	2
DOID:8778	Crohn's disease	2/50	0.152320802	0.310742234	0.222518979	ICAM1/ITGB2	2
DOID:0050704	childhood electroclinical syndrome	1/112	0.154336938	0.310742234	0.222518979	SLC2A1	1
DOID:11266	hemorrhagic fever with renal syndrome	1/112	0.154336938	0.310742234	0.222518979	ICAM1	1
DOID:12120	pulmonary alveolar proteinosis	1/112	0.154336938	0.310742234	0.222518979	CTSH	1
DOID:14018	alcoholic liver cirrhosis	1/112	0.154336938	0.310742234	0.222518979	MPO	1
DOID:14504	Niemann-Pick disease	1/112	0.154336938	0.310742234	0.222518979	NPC2	1
DOID:1574	alcohol abuse	1/112	0.154336938	0.310742234	0.222518979	ANPEP	1
DOID:182	calcinosis	1/112	0.154336938	0.310742234	0.222518979	MPO	1
DOID:1825	childhood absence epilepsy	1/112	0.154336938	0.310742234	0.222518979	SLC2A1	1
DOID:3382	liposarcoma	1/112	0.154336938	0.310742234	0.222518979	TOP2A	1
DOID:3911	progeria	1/112	0.154336938	0.310742234	0.222518979	SYNE2	1
DOID:3939	lipomatous cancer	1/112	0.154336938	0.310742234	0.222518979	TOP2A	1
DOID:8502	bullous skin disease	1/112	0.154336938	0.310742234	0.222518979	ICAM1	1
DOID:0060122	integumentary system cancer	3/98	0.154543207	0.310742234	0.222518979	SOD2/PCNA/SLC2A1	3
DOID:4159	skin cancer	3/98	0.154543207	0.310742234	0.222518979	SOD2/PCNA/SLC2A1	3
DOID:4481	allergic rhinitis	3/99	0.15786259	0.316286969	0.2264895	HMOX1/TLR2/ICAM1	3
DOID:2163	nasal cavity disease	3/101	0.164567325	0.321312131	0.230087961	HMOX1/TLR2/ICAM1	3
DOID:2825	nose disease	3/101	0.164567325	0.321312131	0.230087961	HMOX1/TLR2/ICAM1	3
DOID:4483	rhinitis	3/101	0.164567325	0.321312131	0.230087961	HMOX1/TLR2/ICAM1	3
DOID:1089	tethered spinal cord syndrome	1/13	0.166077851	0.321312131	0.230087961	SLC2A1	1
DOID:12571	phacogenic glaucoma	1/13	0.166077851	0.321312131	0.230087961	SOD2	1
DOID:12895	keratoconjunctivitis sicca	1/13	0.166077851	0.321312131	0.230087961	EIF2AK2	1
DOID:13544	low tension glaucoma	1/13	0.166077851	0.321312131	0.230087961	TLR2	1
DOID:13608	biliary atresia	1/13	0.166077851	0.321312131	0.230087961	ICAM1	1
DOID:13641	exfoliation syndrome	1/13	0.166077851	0.321312131	0.230087961	SOD2	1
DOID:9368	keratoconjunctivitis	1/13	0.166077851	0.321312131	0.230087961	EIF2AK2	1
DOID:5295	intestinal disease	4/157	0.173278215	0.323680115	0.231783648	ICAM1/ITGB2/EPCAM/SLC6A4	4
DOID:6050	esophageal disease	2/55	0.176869701	0.323680115	0.231783648	SOD2/MAD2L1	2
DOID:9588	encephalitis	2/55	0.176869701	0.323680115	0.231783648	EIF2AK2/LTF	2
DOID:1003	pelvic inflammatory disease	1/14	0.177657205	0.323680115	0.231783648	MPO	1
DOID:10140	dry eye syndrome	1/14	0.177657205	0.323680115	0.231783648	EIF2AK2	1
DOID:121	vaginal disease	1/14	0.177657205	0.323680115	0.231783648	TLR2	1
DOID:12206	dengue hemorrhagic fever	1/14	0.177657205	0.323680115	0.231783648	ICAM1	1
DOID:12241	beta thalassemia	1/14	0.177657205	0.323680115	0.231783648	LCN2	1
DOID:1400	lacrimal apparatus disease	1/14	0.177657205	0.323680115	0.231783648	EIF2AK2	1
DOID:2170	vaginitis	1/14	0.177657205	0.323680115	0.231783648	TLR2	1
DOID:2226	chronic myeloproliferative disease	1/14	0.177657205	0.323680115	0.231783648	CD177	1
DOID:3149	keratoacanthoma	1/14	0.177657205	0.323680115	0.231783648	SLC2A1	1
DOID:3385	bacterial vaginosis	1/14	0.177657205	0.323680115	0.231783648	TLR2	1
DOID:4330	non-langerhans-cell histiocytosis	1/14	0.177657205	0.323680115	0.231783648	NPC2	1
DOID:5408	Paget's disease of bone	1/14	0.177657205	0.323680115	0.231783648	SQSTM1	1
DOID:6204	follicular adenoma	1/14	0.177657205	0.323680115	0.231783648	LCN2	1
DOID:9563	bronchiectasis	1/14	0.177657205	0.323680115	0.231783648	TLR2	1
DOID:3347	osteosarcoma	5/215	0.177901157	0.323680115	0.231783648	SQSTM1/ASS1/MAD2L1/SLC2A1/IDH1	5
DOID:4362	cervical cancer	3/105	0.178225286	0.323680115	0.231783648	TOP2A/SOD2/SLC2A1	3
DOID:11054	urinary bladder cancer	3/107	0.185169784	0.334136502	0.239271348	DNMT1/SOD2/SLC2A1	3
DOID:9119	acute myeloid leukemia	3/107	0.185169784	0.334136502	0.239271348	MPO/LCN2/CAMP	3
DOID:2645	benign mesothelioma	2/57	0.186859022	0.334749893	0.23971059	PLXNA1/SOD2	2
DOID:11949	Creutzfeldt-Jakob disease	1/15	0.189077204	0.334749893	0.23971059	CTSD	1
DOID:1395	schistosomiasis	1/15	0.189077204	0.334749893	0.23971059	ICAM1	1
DOID:14268	sclerosing cholangitis	1/15	0.189077204	0.334749893	0.23971059	ICAM1	1
DOID:2891	thyroid adenoma	1/15	0.189077204	0.334749893	0.23971059	LCN2	1
DOID:3948	adrenocortical carcinoma	1/15	0.189077204	0.334749893	0.23971059	SLC2A1	1
DOID:2462	retinal vascular disease	2/58	0.191883736	0.337073071	0.241374191	SOD2/ICAM1	2
DOID:8947	diabetic retinopathy	2/58	0.191883736	0.337073071	0.241374191	SOD2/ICAM1	2
DOID:0060031	autoimmune disease of gastrointestinal tract	3/109	0.192185534	0.337073071	0.241374191	HP/BAK1/ICAM1	3
DOID:4450	renal cell carcinoma	7/342	0.195913845	0.337698897	0.241822338	ASS1/LTF/SOD2/MAD2L1/TK1/SLC2A1/EPCAM	7
DOID:1428	endocrine pancreas disease	2/59	0.196926493	0.337698897	0.241822338	ICAM1/SLC2A1	2
DOID:11612	polycystic ovary syndrome	4/166	0.198365314	0.337698897	0.241822338	LCN2/HMOX1/C3/LPIN1	4
DOID:10808	gastric ulcer	1/16	0.200340021	0.337698897	0.241822338	TLR2	1
DOID:11729	Lyme disease	1/16	0.200340021	0.337698897	0.241822338	TLR2	1
DOID:11870	Pick's disease	1/16	0.200340021	0.337698897	0.241822338	SQSTM1	1
DOID:12205	dengue disease	1/16	0.200340021	0.337698897	0.241822338	ICAM1	1
DOID:1679	cystitis	1/16	0.200340021	0.337698897	0.241822338	PCNA	1
DOID:2615	papilloma	1/16	0.200340021	0.337698897	0.241822338	CTSS	1
DOID:3265	chronic granulomatous disease	1/16	0.200340021	0.337698897	0.241822338	CYBB	1
DOID:3319	lymphangioleiomyomatosis	1/16	0.200340021	0.337698897	0.241822338	CTSK	1
DOID:61	mitral valve disease	1/16	0.200340021	0.337698897	0.241822338	CYBB	1
DOID:9637	stomatitis	1/16	0.200340021	0.337698897	0.241822338	SLC6A4	1
DOID:11260	rabies	2/60	0.201985845	0.338446519	0.242357702	CAMP/DDX58	2
DOID:11714	gestational diabetes	2/60	0.201985845	0.338446519	0.242357702	HP/SLC2A1	2
DOID:12603	acute leukemia	3/112	0.202833426	0.338858215	0.242652513	MPO/EIF2AK2/DNMT1	3
DOID:3082	interstitial lung disease	4/170	0.209859592	0.341256365	0.244369801	HMOX1/IRF5/CTSK/SOD2	4
DOID:10762	portal hypertension	1/17	0.211447799	0.341256365	0.244369801	HMOX1	1
DOID:10976	membranous glomerulonephritis	1/17	0.211447799	0.341256365	0.244369801	SOD2	1
DOID:11983	Prader-Willi syndrome	1/17	0.211447799	0.341256365	0.244369801	C3	1
DOID:1508	candidiasis	1/17	0.211447799	0.341256365	0.244369801	TLR2	1
DOID:1882	atrial heart septal defect	1/17	0.211447799	0.341256365	0.244369801	SLC6A4	1
DOID:240	iris disease	1/17	0.211447799	0.341256365	0.244369801	SOD2	1
DOID:5395	functioning pituitary adenoma	1/17	0.211447799	0.341256365	0.244369801	PCNA	1
DOID:8689	anorexia nervosa	1/17	0.211447799	0.341256365	0.244369801	SLC6A4	1
DOID:8923	skin melanoma	1/17	0.211447799	0.341256365	0.244369801	PCNA	1
DOID:10124	corneal disease	2/62	0.212148717	0.341256365	0.244369801	LTF/ICAM1	2
DOID:13580	cholestasis	2/62	0.212148717	0.341256365	0.244369801	HMOX1/ICAM1	2
DOID:3454	brain infarction	2/62	0.212148717	0.341256365	0.244369801	MPO/ICAM1	2
DOID:2730	epidermolysis bullosa	1/18	0.222402654	0.352711815	0.252572918	DST	1
DOID:365	bladder disease	1/18	0.222402654	0.352711815	0.252572918	PCNA	1
DOID:660	adrenal cortex cancer	1/18	0.222402654	0.352711815	0.252572918	SLC2A1	1
DOID:8719	in situ carcinoma	1/18	0.222402654	0.352711815	0.252572918	PCNA	1
DOID:9428	intracranial hypertension	1/18	0.222402654	0.352711815	0.252572918	B4GALT1	1
DOID:4029	gastritis	2/65	0.227483307	0.359755905	0.25761711	SLC7A2/TLR2	2
DOID:750	peptic ulcer disease	2/66	0.232613777	0.36369905	0.260440752	MPO/TLR2	2
DOID:214	teeth hard tissue disease	1/19	0.233206673	0.36369905	0.260440752	LTF	1
DOID:2731	vesiculobullous skin disease	1/19	0.233206673	0.36369905	0.260440752	DST	1
DOID:2876	laryngeal squamous cell carcinoma	1/19	0.233206673	0.36369905	0.260440752	PCNA	1
DOID:2986	IgA glomerulonephritis	1/19	0.233206673	0.36369905	0.260440752	LCN2	1
DOID:12306	vitiligo	2/67	0.237751671	0.369762957	0.264783047	COMT/IFI30	2
DOID:10286	prostate carcinoma	3/122	0.239234409	0.370024649	0.264970442	SQSTM1/SOD2/COMT	3
DOID:1205	hypersensitivity reaction type I disease	3/122	0.239234409	0.370024649	0.264970442	EIF2AK2/CTSK/TLR2	3
DOID:1588	thrombocytopenia	2/68	0.24289581	0.37106556	0.265715826	ICAM1/ITGB2	2
DOID:10883	herpangina	1/20	0.243861913	0.37106556	0.265715826	SLC6A4	1
DOID:14067	Plasmodium falciparum malaria	1/20	0.243861913	0.37106556	0.265715826	CYBB	1
DOID:1827	idiopathic generalized epilepsy	1/20	0.243861913	0.37106556	0.265715826	HP	1
DOID:8632	Kaposi's sarcoma	1/20	0.243861913	0.37106556	0.265715826	ICAM1	1
DOID:9007	sudden infant death syndrome	1/20	0.243861913	0.37106556	0.265715826	SLC6A4	1
DOID:3620	central nervous system cancer	3/124	0.246651953	0.373394014	0.267383205	ANPEP/PCNA/DPP9	3
DOID:0060180	colitis	2/69	0.248045046	0.373394014	0.267383205	ICAM1/SLC6A4	2
DOID:2030	anxiety disorder	2/69	0.248045046	0.373394014	0.267383205	COMT/SLC6A4	2
DOID:8577	ulcerative colitis	2/69	0.248045046	0.373394014	0.267383205	ICAM1/SLC6A4	2
DOID:974	upper respiratory tract disease	3/126	0.25410617	0.378863858	0.271300099	HMOX1/TLR2/ICAM1	3
DOID:10575	calcium metabolism disease	1/21	0.254370406	0.378863858	0.271300099	MPO	1
DOID:3308	embryonal carcinoma	1/21	0.254370406	0.378863858	0.271300099	DNMT1	1
DOID:3953	adrenal gland cancer	1/21	0.254370406	0.378863858	0.271300099	SLC2A1	1
DOID:3326	purpura	2/71	0.258354363	0.383149944	0.274369316	HMOX1/TLR2	2
DOID:0050032	mineral metabolism disease	1/22	0.264734153	0.383149944	0.274369316	MPO	1
DOID:0060071	pre-malignant neoplasm	1/22	0.264734153	0.383149944	0.274369316	PCNA	1
DOID:11123	Henoch-Schoenlein purpura	1/22	0.264734153	0.383149944	0.274369316	HMOX1	1
DOID:14221	metabolic syndrome X	1/22	0.264734153	0.383149944	0.274369316	C3	1
DOID:1557	hypersensitivity reaction type III disease	1/22	0.264734153	0.383149944	0.274369316	HMOX1	1
DOID:3181	oligodendroglioma	1/22	0.264734153	0.383149944	0.274369316	IDH1	1
DOID:3369	peripheral primitive neuroectodermal tumor	1/22	0.264734153	0.383149944	0.274369316	SOD2	1
DOID:649	prion disease	1/22	0.264734153	0.383149944	0.274369316	CTSD	1
DOID:9252	amino acid metabolic disorder	1/22	0.264734153	0.383149944	0.274369316	ASS1	1
DOID:9809	hypersensitivity vasculitis	1/22	0.264734153	0.383149944	0.274369316	HMOX1	1
DOID:0060049	autoimmune disease of urogenital tract	2/73	0.268671023	0.385871902	0.276318479	TLR2/ICAM1	2
DOID:12236	primary biliary cirrhosis	2/73	0.268671023	0.385871902	0.276318479	TLR2/ICAM1	2
DOID:3744	cervical squamous cell carcinoma	2/73	0.268671023	0.385871902	0.276318479	SOD2/SLC2A1	2
DOID:4451	renal carcinoma	7/380	0.274300899	0.392892738	0.28134602	ASS1/LTF/SOD2/MAD2L1/TK1/SLC2A1/EPCAM	7
DOID:11723	Duchenne muscular dystrophy	1/23	0.274955131	0.392892738	0.28134602	CAPN1	1
DOID:1564	fungal infectious disease	2/76	0.284142078	0.40219265	0.288005581	SOD2/TLR2	2
DOID:1681	heart septal defect	1/24	0.285035289	0.40219265	0.288005581	SLC6A4	1
DOID:272	hepatic vascular disease	1/24	0.285035289	0.40219265	0.288005581	HMOX1	1
DOID:3151	skin squamous cell carcinoma	1/24	0.285035289	0.40219265	0.288005581	SLC2A1	1
DOID:4468	clear cell adenocarcinoma	1/24	0.285035289	0.40219265	0.288005581	EPCAM	1
DOID:15	reproductive system disease	7/386	0.287422178	0.404546715	0.2896913	MPO/ITGA5/LTF/C3/SOD2/TLR2/ICAM1	7
DOID:3565	meningioma	2/77	0.289294219	0.406166198	0.290850994	ANPEP/DPP9	2
DOID:0060118	thoracic disease	1/25	0.294976549	0.41005382	0.293634876	PCNA	1
DOID:13810	familial hypercholesterolemia	1/25	0.294976549	0.41005382	0.293634876	MPO	1
DOID:3463	breast disease	1/25	0.294976549	0.41005382	0.293634876	PCNA	1
DOID:4531	mucoepidermoid carcinoma	1/25	0.294976549	0.41005382	0.293634876	SLC2A1	1
DOID:9538	multiple myeloma	5/264	0.303392526	0.411490637	0.294663764	ITGA5/DNMT1/SOD2/PCNA/ICAM1	5
DOID:12361	Graves' disease	2/80	0.304723424	0.411490637	0.294663764	BAK1/ICAM1	2
DOID:0002116	pterygium	1/26	0.304780809	0.411490637	0.294663764	ICAM1	1
DOID:10139	conjunctival degeneration	1/26	0.304780809	0.411490637	0.294663764	ICAM1	1
DOID:10526	conjunctival pterygium	1/26	0.304780809	0.411490637	0.294663764	ICAM1	1
DOID:10588	adrenoleukodystrophy	1/26	0.304780809	0.411490637	0.294663764	BCAP31	1
DOID:13809	familial combined hyperlipidemia	1/26	0.304780809	0.411490637	0.294663764	C3	1
DOID:205	hyperostosis	1/26	0.304780809	0.411490637	0.294663764	SQSTM1	1
DOID:2600	laryngeal carcinoma	1/26	0.304780809	0.411490637	0.294663764	PCNA	1
DOID:3978	extrinsic cardiomyopathy	1/26	0.304780809	0.411490637	0.294663764	LCN2	1
DOID:820	myocarditis	1/26	0.304780809	0.411490637	0.294663764	LCN2	1
DOID:986	alopecia areata	1/26	0.304780809	0.411490637	0.294663764	ICAM1	1
DOID:326	ischemia	4/204	0.313477045	0.421218206	0.301629565	MPO/C3/SOD2/ICAM1	4
DOID:2352	hemochromatosis	1/27	0.31444994	0.421218206	0.301629565	MPO	1
DOID:3275	thymoma	1/27	0.31444994	0.421218206	0.301629565	SLC2A1	1
DOID:1168	familial hyperlipidemia	2/82	0.314978446	0.421218206	0.301629565	MPO/C3	2
DOID:440	neuromuscular disease	2/83	0.320094217	0.427045128	0.305802158	C3/ACSL4	2
DOID:11335	sarcoidosis	2/84	0.325201147	0.432832732	0.309946595	TLR2/MRC1	2
DOID:12177	common variable immunodeficiency	1/29	0.33339017	0.441643919	0.316256186	FCGRT	1
DOID:3193	peripheral nerve sheath neoplasm	1/29	0.33339017	0.441643919	0.316256186	SLC2A1	1
DOID:0060005	autoimmune disease of endocrine system	2/87	0.340461657	0.447610978	0.320529129	BAK1/ICAM1	2
DOID:0050701	electroclinical syndrome	1/30	0.342664887	0.447610978	0.320529129	SLC2A1	1
DOID:10907	microcephaly	1/30	0.342664887	0.447610978	0.320529129	SLC2A1	1
DOID:1967	leiomyosarcoma	1/30	0.342664887	0.447610978	0.320529129	TOP2A	1
DOID:4230	smooth muscle cancer	1/30	0.342664887	0.447610978	0.320529129	TOP2A	1
DOID:5353	colonic disease	1/30	0.342664887	0.447610978	0.320529129	SLC6A4	1
DOID:289	endometriosis	2/88	0.345526097	0.449263725	0.321712642	LTF/ICAM1	2
DOID:2916	hypersensitivity reaction type IV disease	2/88	0.345526097	0.449263725	0.321712642	TLR2/MRC1	2
DOID:2583	agammaglobulinemia	1/31	0.351811709	0.454288973	0.325311165	FCGRT	1
DOID:319	spinal cord disease	1/31	0.351811709	0.454288973	0.325311165	SLC2A1	1
DOID:620	blood protein disease	1/31	0.351811709	0.454288973	0.325311165	FCGRT	1
DOID:3146	lipid metabolism disorder	2/92	0.365654677	0.467769037	0.334964085	MPO/C3	2
DOID:9500	leukocyte disease	2/92	0.365654677	0.467769037	0.334964085	ELANE/CAMP	2
DOID:3312	bipolar disorder	3/156	0.367936482	0.467769037	0.334964085	GCH1/COMT/SLC6A4	3
DOID:0060115	nervous system benign neoplasm	1/33	0.369728635	0.467769037	0.334964085	EPCAM	1
DOID:1094	attention deficit hyperactivity disorder	1/33	0.369728635	0.467769037	0.334964085	SLC6A4	1
DOID:2115	B cell deficiency	1/33	0.369728635	0.467769037	0.334964085	FCGRT	1
DOID:3277	thymus cancer	1/33	0.369728635	0.467769037	0.334964085	SLC2A1	1
DOID:3355	fibrosarcoma	1/33	0.369728635	0.467769037	0.334964085	CTSK	1
DOID:3443	mammary Paget's disease	1/33	0.369728635	0.467769037	0.334964085	SQSTM1	1
DOID:10223	dermatomyositis	1/34	0.378502164	0.474602936	0.339857763	TLR2	1
DOID:11981	morbid obesity	1/34	0.378502164	0.474602936	0.339857763	ICAM1	1
DOID:13250	diarrhea	1/34	0.378502164	0.474602936	0.339857763	SLC6A4	1
DOID:4251	conjunctival disease	1/34	0.378502164	0.474602936	0.339857763	ICAM1	1
DOID:9452	fatty liver disease	2/95	0.380598905	0.476171519	0.340981007	HMOX1/ICAM1	2
DOID:7998	hyperthyroidism	2/96	0.385548389	0.479050697	0.343042754	BAK1/ICAM1	2
DOID:10316	pneumoconiosis	1/35	0.387154649	0.479050697	0.343042754	SOD2	1
DOID:1272	telangiectasis	1/35	0.387154649	0.479050697	0.343042754	BAK1	1
DOID:13207	proliferative diabetic retinopathy	1/35	0.387154649	0.479050697	0.343042754	ICAM1	1
DOID:2596	larynx cancer	1/35	0.387154649	0.479050697	0.343042754	PCNA	1
DOID:1380	endometrial cancer	2/97	0.390481059	0.48112581	0.344528719	PCNA/SLC2A1	2
DOID:3996	urinary system cancer	8/500	0.390540844	0.48112581	0.344528719	ASS1/DNMT1/LTF/SOD2/MAD2L1/TK1/SLC2A1/EPCAM	8
DOID:363	uterine cancer	2/98	0.395396431	0.486044084	0.348050639	PCNA/SLC2A1	2
DOID:0060089	endocrine organ benign neoplasm	2/99	0.400294036	0.490992466	0.351594119	LCN2/PCNA	2
DOID:263	kidney cancer	7/437	0.403249728	0.493514176	0.353399887	ASS1/LTF/SOD2/MAD2L1/TK1/SLC2A1/EPCAM	7
DOID:3405	histiocytosis	1/37	0.404103082	0.493514176	0.353399887	NPC2	1
DOID:1542	head and neck carcinoma	4/235	0.411515854	0.501259926	0.35894653	ANPEP/SOD2/SLC2A1/TALDO1	4
DOID:9261	nasopharynx carcinoma	1/38	0.412402274	0.501259926	0.35894653	LTF	1
DOID:1520	colon carcinoma	3/168	0.413116529	0.501259926	0.35894653	HMOX1/EPCAM/CASP6	3
DOID:9884	muscular dystrophy	2/103	0.419697969	0.508133968	0.363868953	CAPN1/SYNE2	2
DOID:2473	opportunistic mycosis	1/39	0.420586907	0.508133968	0.363868953	TLR2	1
DOID:11934	head and neck cancer	4/239	0.424063006	0.510221488	0.365363803	ANPEP/SOD2/SLC2A1/TALDO1	4
DOID:2893	cervix carcinoma	2/104	0.424500261	0.510221488	0.365363803	SOD2/SLC2A1	2
DOID:0060119	pharynx cancer	1/40	0.428658551	0.510221488	0.365363803	LTF	1
DOID:12704	ataxia telangiectasia	1/40	0.428658551	0.510221488	0.365363803	BAK1	1
DOID:3111	cystadenocarcinoma	1/40	0.428658551	0.510221488	0.365363803	SLC2A1	1
DOID:3114	serous cystadenocarcinoma	1/40	0.428658551	0.510221488	0.365363803	SLC2A1	1
DOID:896	metal metabolism disorder	1/40	0.428658551	0.510221488	0.365363803	MPO	1
DOID:5520	head and neck squamous cell carcinoma	3/174	0.435355033	0.516420915	0.369803142	ANPEP/SOD2/TALDO1	3
DOID:1790	malignant mesothelioma	1/41	0.436618749	0.516420915	0.369803142	SLC2A1	1
DOID:437	myasthenia gravis	1/41	0.436618749	0.516420915	0.369803142	C3	1
DOID:4045	muscle cancer	2/107	0.438784177	0.517894113	0.370858082	TOP2A/CAPN1	2
DOID:0050136	systemic mycosis	1/42	0.444469028	0.52132513	0.373314995	TLR2	1
DOID:11077	brucellosis	1/42	0.444469028	0.52132513	0.373314995	TLR2	1
DOID:439	neuromuscular junction disease	1/42	0.444469028	0.52132513	0.373314995	C3	1
DOID:543	dystonia	1/43	0.452210891	0.529302976	0.379027839	GCH1	1
DOID:1555	urticaria	1/44	0.459845822	0.537122817	0.384627538	SOD2	1
DOID:3458	breast adenocarcinoma	1/45	0.467375285	0.54478734	0.390116016	SQSTM1	1
DOID:2490	congenital nervous system abnormality	1/46	0.474800723	0.551160427	0.394679711	SLC2A1	1
DOID:3602	toxic encephalopathy	1/46	0.474800723	0.551160427	0.394679711	SLC2A1	1
DOID:6713	cerebrovascular disease	2/116	0.480453564	0.553950134	0.396677388	MPO/ICAM1	2
DOID:768	retinoblastoma	2/116	0.480453564	0.553950134	0.396677388	EPCAM/ANP32A	2
DOID:771	retinal cell cancer	2/116	0.480453564	0.553950134	0.396677388	EPCAM/ANP32A	2
DOID:767	muscular atrophy	1/47	0.482123562	0.553950134	0.396677388	EIF2AK2	1
DOID:9973	substance dependence	1/47	0.482123562	0.553950134	0.396677388	SLC6A4	1
DOID:1575	rheumatic disease	3/188	0.485968171	0.554969737	0.397407515	HP/IRF5/ICAM1	3
DOID:418	systemic scleroderma	3/188	0.485968171	0.554969737	0.397407515	HP/IRF5/ICAM1	3
DOID:419	scleroderma	3/188	0.485968171	0.554969737	0.397407515	HP/IRF5/ICAM1	3
DOID:345	uterine disease	1/48	0.489345206	0.555626644	0.397877918	SOD2	1
DOID:4645	retinal cancer	2/118	0.48945835	0.555626644	0.397877918	EPCAM/ANP32A	2
DOID:3324	mood disorder	3/189	0.489504112	0.555626644	0.397877918	GCH1/COMT/SLC6A4	3
DOID:0060041	autism spectrum disorder	3/190	0.493028502	0.557379612	0.399133199	COMT/CTSD/SLC6A4	3
DOID:12849	autistic disorder	3/190	0.493028502	0.557379612	0.399133199	COMT/CTSD/SLC6A4	3
DOID:10241	thalassemia	1/49	0.496467041	0.559021888	0.400309214	LCN2	1
DOID:9952	acute lymphocytic leukemia	1/49	0.496467041	0.559021888	0.400309214	TOP2A	1
DOID:1115	sarcoma	3/193	0.503530721	0.565843904	0.405194382	ANPEP/SOD2/SLC2A1	3
DOID:10825	essential hypertension	2/122	0.5071761	0.568805068	0.407314838	HMOX1/SLC6A4	2
DOID:4079	heart valve disease	1/51	0.510416732	0.570167897	0.408290745	CYBB	1
DOID:8567	Hodgkin's lymphoma	1/51	0.510416732	0.570167897	0.408290745	ICAM1	1
DOID:1107	esophageal carcinoma	2/123	0.511543666	0.570295216	0.408381916	SOD2/EPCAM	2
DOID:9415	allergic asthma	1/52	0.517247268	0.574379116	0.41130635	TLR2	1
DOID:987	alopecia	1/52	0.517247268	0.574379116	0.41130635	ICAM1	1
DOID:7166	thyroiditis	1/53	0.523983353	0.580713834	0.41584257	ICAM1	1
DOID:2018	hyperinsulinism	1/54	0.530626281	0.58495202	0.418877487	ICAM1	1
DOID:0060040	pervasive developmental disorder	3/201	0.530989644	0.58495202	0.418877487	COMT/CTSD/SLC6A4	3
DOID:854	collagen disease	3/201	0.530989644	0.58495202	0.418877487	HP/IRF5/ICAM1	3
DOID:4896	bile duct adenocarcinoma	2/128	0.533002463	0.58495202	0.418877487	LCN2/DNMT1	2
DOID:4947	cholangiocarcinoma	2/128	0.533002463	0.58495202	0.418877487	LCN2/DNMT1	2
DOID:438	autoimmune disease of the nervous system	1/55	0.537177328	0.58838684	0.421337122	C3	1
DOID:3526	cerebral infarction	1/56	0.543637755	0.594306905	0.425576414	ICAM1	1
DOID:3070	malignant glioma	3/207	0.551029631	0.601220315	0.430527027	ITGA5/ICAM1/IDH1	3
DOID:1682	congenital heart disease	1/58	0.5562917	0.603453232	0.432125994	SLC6A4	1
DOID:3451	skin carcinoma	1/58	0.5562917	0.603453232	0.432125994	SLC2A1	1
DOID:3829	pituitary adenoma	1/58	0.5562917	0.603453232	0.432125994	PCNA	1
DOID:110	lens disease	1/59	0.562487652	0.606667717	0.43442785	PCNA	1
DOID:4535	hypotrichosis	1/59	0.562487652	0.606667717	0.43442785	ICAM1	1
DOID:83	cataract	1/59	0.562487652	0.606667717	0.43442785	PCNA	1
DOID:3627	aortic aneurysm	1/60	0.568597852	0.610917158	0.437470826	ITGA5	1
DOID:4007	bladder carcinoma	1/60	0.568597852	0.610917158	0.437470826	DNMT1	1
DOID:1067	open-angle glaucoma	1/61	0.574623477	0.613876693	0.439590116	TLR2	1
DOID:14250	Down syndrome	1/61	0.574623477	0.613876693	0.439590116	CAMP	1
DOID:520	aortic disease	1/61	0.574623477	0.613876693	0.439590116	ITGA5	1
DOID:4606	bile duct cancer	2/140	0.581858884	0.619256242	0.443442349	LCN2/DNMT1	2
DOID:4897	bile duct carcinoma	2/140	0.581858884	0.619256242	0.443442349	LCN2/DNMT1	2
DOID:1100	ovarian disease	1/64	0.59220442	0.627236365	0.449156825	LTF	1
DOID:643	progressive multifocal leukoencephalopathy	1/64	0.59220442	0.627236365	0.449156825	MORC3	1
DOID:0060038	specific developmental disorder	3/220	0.592699371	0.627236365	0.449156825	ACSL4/COMT/SLC6A4	3
DOID:421	hair disease	1/65	0.597903188	0.631556275	0.452250263	ICAM1	1
DOID:5041	esophageal cancer	2/145	0.601092685	0.633736295	0.453811351	SOD2/EPCAM	2
DOID:6590	spondylitis	1/68	0.614530227	0.646692556	0.463089182	SOD2	1
DOID:7147	ankylosing spondylitis	1/69	0.619919715	0.651147014	0.466278969	SOD2	1
DOID:635	acquired immunodeficiency syndrome	1/71	0.630475664	0.661001487	0.473335645	PCNA	1
DOID:332	amyotrophic lateral sclerosis	2/155	0.637566344	0.667193033	0.47776934	C3/TLR2	2
DOID:50	thyroid gland disease	2/159	0.651415266	0.680420769	0.487241572	BAK1/ICAM1	2
DOID:480	movement disease	1/76	0.655611441	0.683535632	0.489472089	GCH1	1
DOID:10584	retinitis pigmentosa	1/77	0.660431404	0.686020075	0.491251171	CA4	1
DOID:1123	spondyloarthropathy	1/77	0.660431404	0.686020075	0.491251171	SOD2	1
DOID:3247	rhabdomyosarcoma	1/79	0.669871672	0.694544662	0.49735553	CAPN1	1
DOID:0050736	autosomal dominant disease	5/409	0.676562791	0.700192741	0.501400056	TOP2A/PCNA/ICAM1/COMT/IKBKB	5
DOID:2871	endometrial carcinoma	1/82	0.683546524	0.704829108	0.504720106	PCNA	1
DOID:3612	retinitis	1/82	0.683546524	0.704829108	0.504720106	CA4	1
DOID:4043	skeletal muscle cancer	1/83	0.68797887	0.708102566	0.507064191	CAPN1	1
DOID:657	adenoma	4/340	0.700094863	0.719258044	0.515052502	HMOX1/TOP2A/PCNA/SLC2A1	4
DOID:0060058	lymphoma	1/88	0.709234414	0.727320538	0.520825962	ICAM1	1
DOID:231	motor neuron disease	2/187	0.736916816	0.754334849	0.540170604	C3/TLR2	2
DOID:381	arthropathy	1/97	0.743940984	0.760142966	0.54432973	SOD2	1
DOID:3498	pancreatic ductal adenocarcinoma	1/98	0.747534227	0.762430743	0.545967981	EPCAM	1
DOID:870	neuropathy	2/194	0.755318619	0.768977184	0.550655813	C3/ACSL4	2
DOID:75	lymphatic system disease	1/101	0.758016848	0.770331201	0.551625409	NPC2	1
DOID:0060037	developmental disorder of mental health	4/373	0.766862487	0.777916361	0.557057055	ACSL4/COMT/CTSD/SLC6A4	4
DOID:5223	infertility	2/206	0.784309374	0.794183773	0.568705964	ITGA5/C3	2
DOID:3069	astrocytoma	1/112	0.792893146	0.801434185	0.573897902	ICAM1	1
DOID:5683	hereditary breast ovarian cancer	2/222	0.818290994	0.82562335	0.591219488	TOP2A/COMT	2
DOID:3770	pulmonary fibrosis	1/123	0.822781559	0.828669083	0.593400503	HMOX1	1
DOID:0080015	physical disorder	1/136	0.852635062	0.857202749	0.613833136	SLC2A1	1
DOID:0050700	cardiomyopathy	1/149	0.877497189	0.880625521	0.630605917	LCN2	1
DOID:1059	intellectual disability	1/150	0.879227631	0.880792093	0.630725197	ACSL4	1
DOID:1781	thyroid cancer	1/213	0.950895769	0.950895769	0.680925642	SOD2	1
